# Supplementary material for: Facile synthesis of carbon nanotube-supported NiO//Fe2O3 for all-solid-state supercapacitors
Source: publisher site journal article supplement (doi:10.3762/bjnano.10.188), 2019-09-23
Supplement: Additional file 1 [file 2190-4286-10-188-S1.pdf]

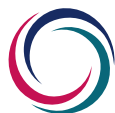

## Supporting Information

for

### **Facile synthesis of carbon nanotube-supported NiO//Fe<sub>2</sub>O<sub>3</sub> for all-solid-state supercapacitors**

Shengming Zhang, Xuhui Wang, Yan Li, Xuemei Mu, Yaxiong Zhang, Jingwei Du, Guo Liu, Xiaohui Hua, Yingzhuo Sheng, Erqing Xie and Zhenxing Zhang

*Beilstein J. Nanotechnol.* **2019**, *10*, 1923–1932. doi:10.3762/bjnano.10.188

### **Specific capacitance calculation and additional figures**

## Calculation

The specific capacitance from GCD can be calculated [1] by the equation

$$C_s = \frac{I * \Delta t}{m * \Delta V} \quad (S1)$$

Where  $C_s$  is the specific capacitance ( $F\ g^{-1}$ ),  $I$  is the response current (A),  $m$  is the mass of active material (mg),  $\Delta t$  is the discharge time (s), and  $\Delta V$  is the voltage window (V).

The capacity ( $C$ ) of the single cell is calculated by the equation

$$C = \frac{C_s}{3.6} \quad (S2)$$

The specific capacitance of full cells can be calculated by equation (S1). The energy density of the device can be calculated by the equation

$$E = \frac{1}{2} * C_s * V^2 \quad (S3)$$

and the power density is given by

$$P = \frac{E}{t} \quad (S4)$$

Where  $E$  is the energy density ( $Wh\ kg^{-1}$ ),  $C_s$  is the specific capacitance ( $F\ g^{-1}$ ) calculated by GCD curves of device,  $V$  is the voltage window (V),  $P$  is the power density ( $W\ kg^{-1}$ ), and  $t$  is the discharge time (s).

To maintain a charge balance between the cathode and anode, the mass ratio between the cathode ( $m_+$ ) and anode ( $m_-$ ) electrodes needs to follow the equation (S5):

$$\frac{m_+}{m_-} = \frac{C_- * \Delta V_-}{C_+ * \Delta V_+} \quad (S5)$$

## Supporting Figures

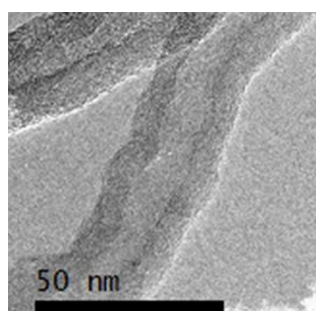

**Figure S1:** TEM of the CNT.

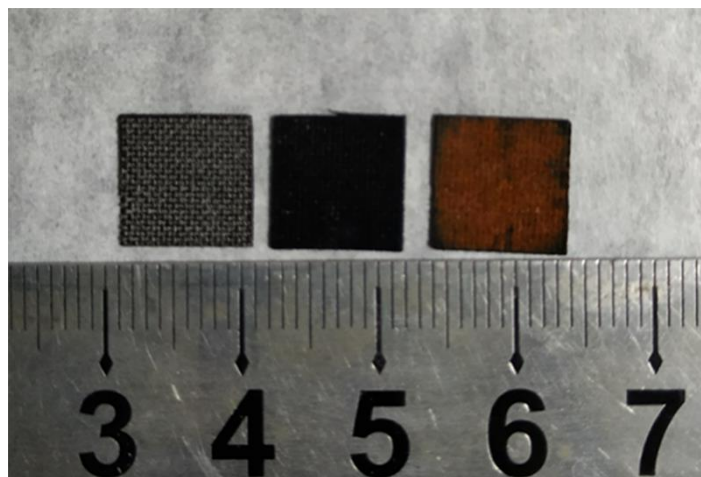

**Figure S2:** Optical photograph of CC, CC-CNT and CC-CNT@Fe<sub>2</sub>O<sub>3</sub> (from left to right).

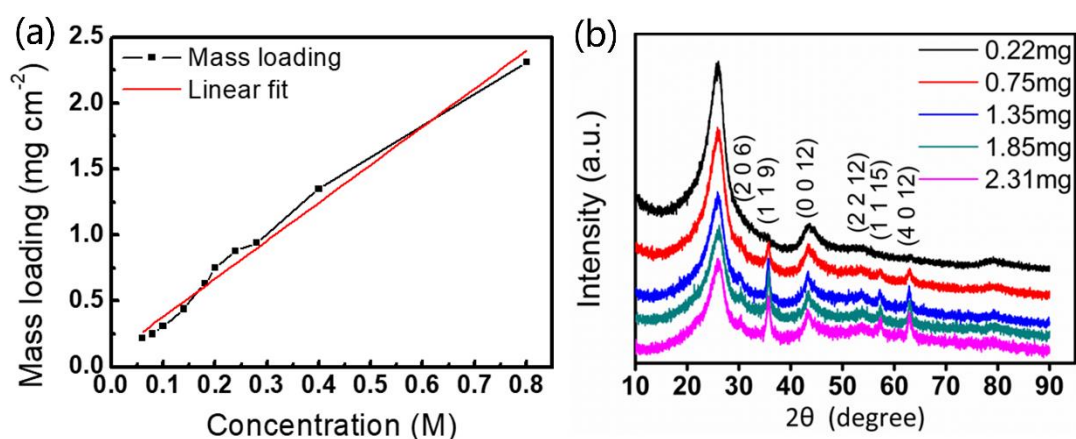

**Figure S3:** (a) Linear relationship between the mass loading of Fe<sub>2</sub>O<sub>3</sub> on CC-CNT and the concentration of the FeCl<sub>3</sub> solution. (b) XRD of CC-CNT@Fe<sub>2</sub>O<sub>3</sub> with different mass loadings of Fe<sub>2</sub>O<sub>3</sub>.

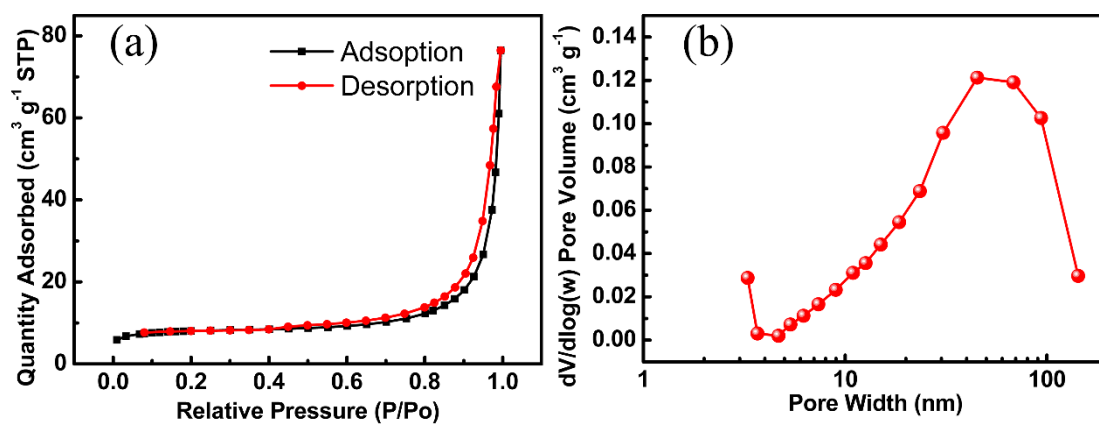

**Figure S4:** (a) N<sub>2</sub> adsorption-desorption isotherms and (b) BJH pore size distribution of CC-CNT@Fe<sub>2</sub>O<sub>3</sub> at 75.9 K and (b) CC-CNT@NiO.

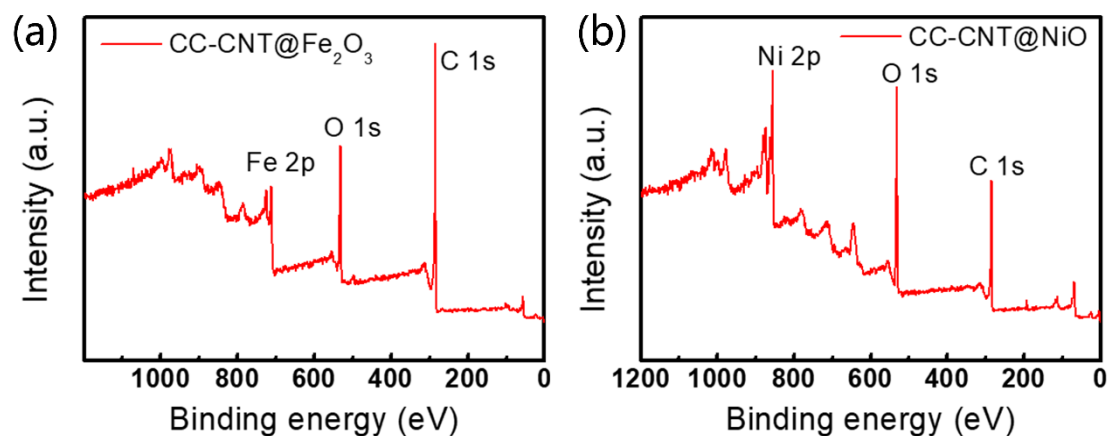

**Figure S5:** Whole XPS spectra of (a) CC-CNT@Fe<sub>2</sub>O<sub>3</sub> and (b) CC-CNT@NiO.

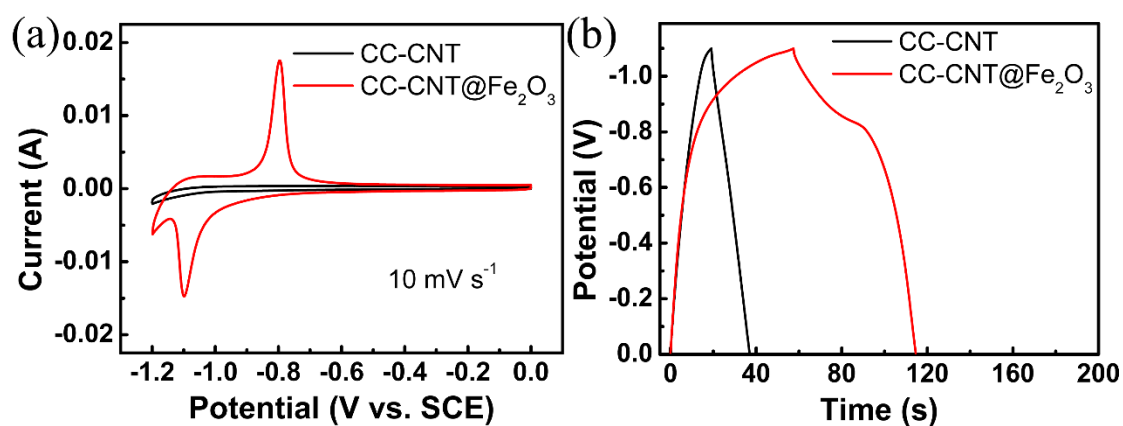

**Figure S6:** Comparison of CC-CNT and CC-CNT@Fe<sub>2</sub>O<sub>3</sub>: (a) CV curves at 10 mV s<sup>-1</sup>, (b) GCD curves at 4.3 mA cm<sup>-2</sup>.

**Table S1:** Fitted EIS values of CC-CNT@Fe<sub>2</sub>O<sub>3</sub> and CC-CNT@NiO.

|                                       | Rs    | CPE-T     | CPE-P | Rct   | W-R  | W-T   | W-P    | C     |
|---------------------------------------|-------|-----------|-------|-------|------|-------|--------|-------|
| CC-CNT@Fe <sub>2</sub> O <sub>3</sub> | 1.125 | 0.0035572 | 0.85  | 0.002 | 0.35 | 0.056 | 0.37   | 0.8   |
| CC-CNT@NiO                            | 1.27  | 0.0012409 | 0.85  | 0.1   | 0.7  | 0.12  | 0.3327 | 0.465 |

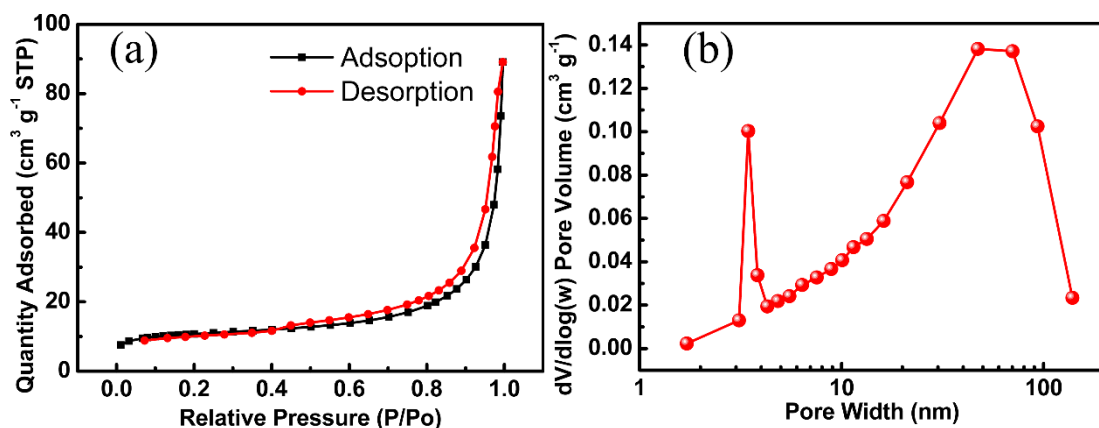

**Figure S7:** (a) N<sub>2</sub> adsorption-desorption isotherms and (b) BJH pore size distribution of CC-CNT@NiO at 75.9 K.

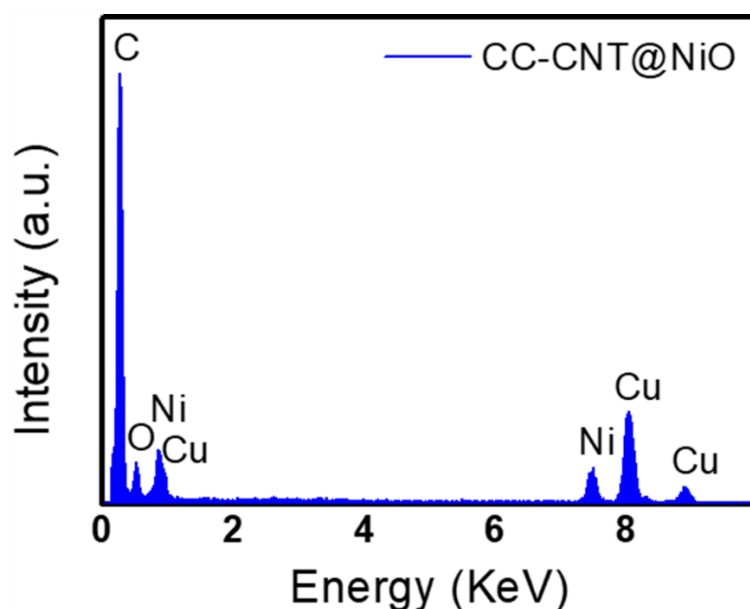

**Figure S8:** EDX of CC-CNT@NiO.

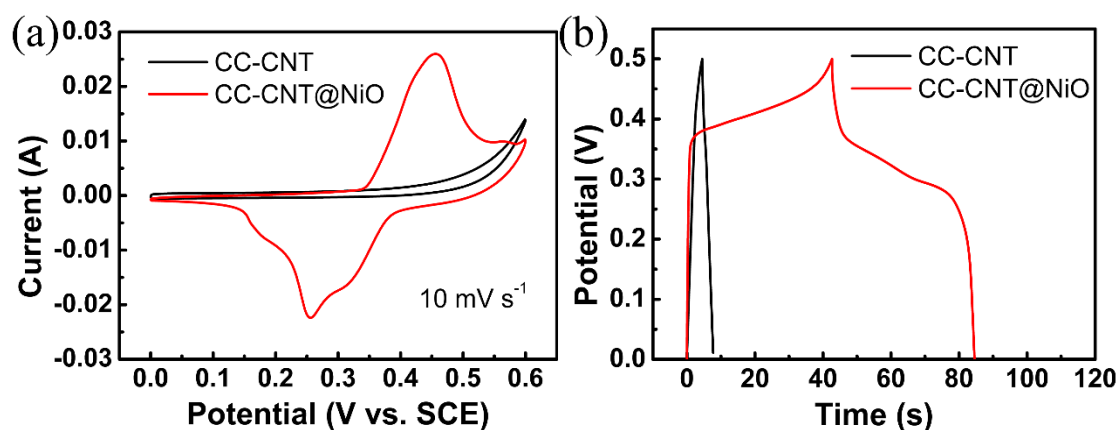

**Figure S9:** Comparison of CC-CNT and CC-CNT@NiO: (a) CV curves at 10 mV s<sup>-1</sup>, (b) GCD curves at 6.6 mA cm<sup>-2</sup>.

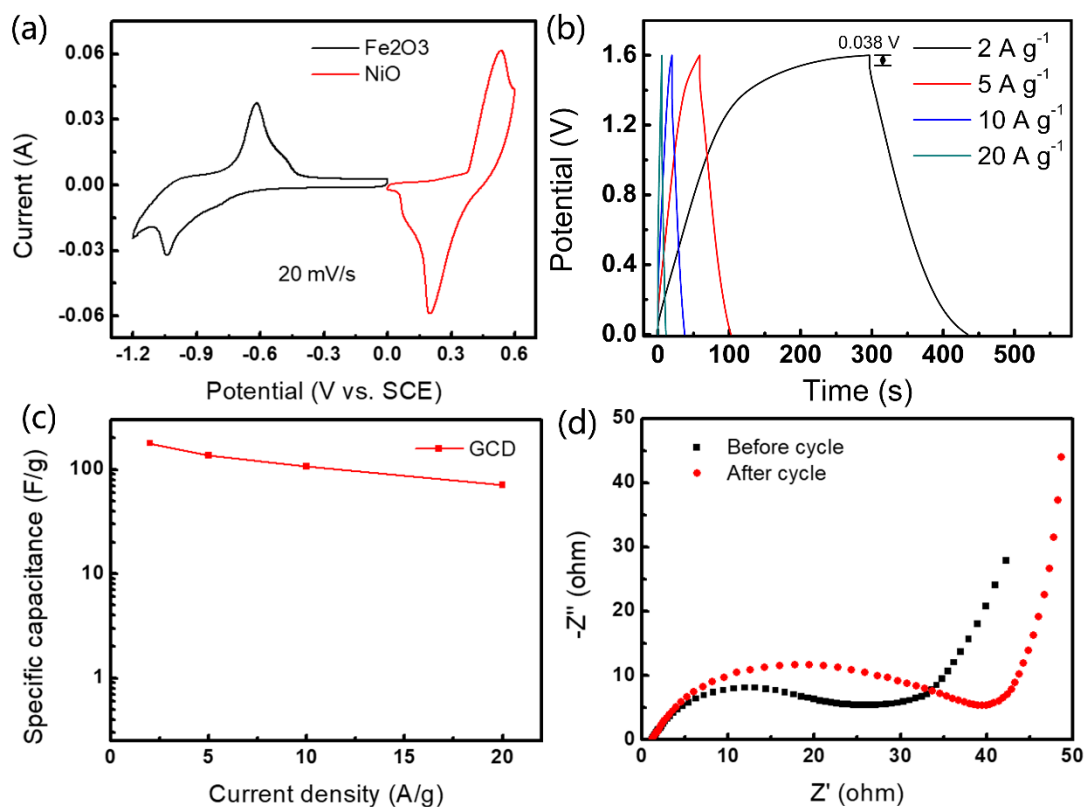

**Figure S10:** (a) CV curves of CC-CNT@Fe<sub>2</sub>O<sub>3</sub> and CC-CNT@NiO at 20 mV s<sup>-1</sup>. (b) GCD curves and (c) Specific capacitances at 2, 5, 10 and 20 A g<sup>-1</sup> of the all-solid-state ASC. (d) EIS curve of the device before and after 5000 cycles.

## References

- [1] Zhou, J.; Zhao, H.; Mu, X.; Chen, J.; Zhang, P.; Wang, Y.; He, Y.; Zhang, Z.; Pan, X.; Xie, E. *Nanoscale* **2015**, *35*, 14697–14706. doi:10.1039/c5nr03426d
